# Supplementary material for: Investigating the composition and recruitment of the mycobacterial ImuA′–ImuB–DnaE2 mutasome
Source: eLife. 2023 Aug 2;12:e75628. doi: 10.7554/eLife.75628 (PMC10421592; doi:10.7554/eLife.75628)
Supplement: Supplementary file 1. [file elife-75628-supp1.xlsx]

## Sheet: DnaN_GRS_contacts
Chain1/DnaN (5ah2)	Resnum1	Resname1	Chain2/GRS (5ah2)	Resnum2	Resname2	Contact area, Å2	Distance, Å	H-bonds/salt bridges
A	159	LEU	E	10	MLU	21.05	4.42	.
A	161	MET	E	7	LEU	1.94	6.17	.
A	161	MET	E	9	PRO	6.22	5.03	.
A	161	MET	E	10	MLU	16.33	3.61	.
A	162	LEU	E	7	LEU	3.19	5.35	.
A	162	LEU	E	10	MLU	4.16	5.25	.
A	179	THR	E	5	LEU	6.19	3.85	.
A	179	THR	E	7	LEU	10.7	4.57	.
A	181	ARG	E	4	NZC	22.57	3.31	.
A	181	ARG	E	5	LEU	16.45	2.83	hb
A	181	ARG	E	7	LEU	15.76	3.86	.
A	181	ARG	E	10	MLU	34.69	2.9	hb
A	181	ARG	E	11	GLY	11.89	3.3	.
A	182	PHE	E	2	MVA	22.94	3.52	.
A	182	PHE	E	3	MP8	6.69	4.13	.
A	182	PHE	E	4	NZC	16.15	3.75	.
A	182	PHE	E	5	LEU	9.04	3.69	.
A	183	ARG	E	5	LEU	7.33	3.67	.
A	184	LEU	E	5	LEU	7.87	3.9	.
A	257	PRO	E	7	LEU	20.95	3.66	.
A	257	PRO	E	8	MVA	3.92	5.49	.
A	258	LYS	E	7	LEU	3.64	5.22	.
A	258	LYS	E	8	MVA	4.65	5.66	.
A	259	PHE	E	7	LEU	2.74	5.24	.
A	261	GLN	E	6	MP8	3.08	5.06	.
A	261	GLN	E	8	MVA	19.98	3.91	.
A	262	LEU	E	5	LEU	12.94	4.5	.
A	262	LEU	E	6	MP8	28.01	3.61	.
A	262	LEU	E	7	LEU	24.08	3.49	.
A	262	LEU	E	8	MVA	0.96	5.44	.
A	337	TYR	E	2	MVA	2.64	5.89	.
A	358	SER	E	3	MP8	14.04	4.13	.
A	359	ARG	E	6	MP8	5.61	5.63	.
A	360	PRO	E	5	LEU	8.44	4.18	.
A	360	PRO	E	6	MP8	21.17	3.99	.
A	389	LEU	E	5	LEU	16.21	4.36	.
A	390	LEU	E	5	LEU	1.31	4.43	.
A	391	MET	E	3	MP8	25.24	3.51	.
A	391	MET	E	4	NZC	15.96	3.19	.
A	391	MET	E	5	LEU	20.54	3.44	.
A	391	MET	E	6	MP8	6.88	4.49	.
A	392	PRO	E	2	MVA	0.14	5.92	.
A	392	PRO	E	3	MP8	15.52	3.42	.
A	393	VAL	E	1	ACE	9.82	3.58	.
A	393	VAL	E	2	MVA	16.75	4.68	.
A	393	VAL	E	3	MP8	7.34	4.21	.
A	394	ARG	E	1	ACE	26.52	3.09	hb
A	394	ARG	E	3	MP8	30.66	3.9	.

## Sheet: DnaN_ImuB_347_359 contacts
Chain1/DnaN	Resnum1	Resname1	Chain2/ImuB	Resnum2	Resname2	Contact area, Å2	Distance, Å	H-bonds/salt bridges
E	162	LEU	C	356	TRP	5.37	4.69	.
E	179	THR	C	355	LEU	4.11	3.64	.
E	179	THR	C	356	TRP	18.49	2.96	.
E	181	ARG	C	354	PRO	17	3.48	.
E	181	ARG	C	355	LEU	16.03	2.58	hb
E	181	ARG	C	356	TRP	29.15	3.46	.
E	182	PHE	C	352	GLN	30.44	3.35	.
E	182	PHE	C	353	LEU	7.22	3.53	.
E	182	PHE	C	354	PRO	13.23	4.13	.
E	182	PHE	C	355	LEU	7.75	3.77	.
E	183	ARG	C	355	LEU	8.07	3.61	.
E	184	LEU	C	355	LEU	9.11	3.87	.
E	184	LEU	C	356	TRP	7.39	4.59	.
E	257	PRO	C	356	TRP	26.28	4.33	.
E	258	LYS	C	356	TRP	1.47	5.3	.
E	259	PHE	C	356	TRP	5.69	4.92	.
E	261	GLN	C	359	ILE	0.77	6.26	.
E	262	LEU	C	355	LEU	20.94	3.94	.
E	262	LEU	C	356	TRP	23.67	2.38	.
E	290	ASP	C	347	SER	10.9	4.94	.
E	290	ASP	C	348	SER	3.93	5.33	.
E	290	ASP	C	349	ALA	0.43	5.4	.
E	291	ARG	C	349	ALA	6.76	5.46	.
E	293	ALA	C	347	SER	1.47	5.86	.
E	293	ALA	C	348	SER	15.97	2.88	.
E	293	ALA	C	349	ALA	25.17	3.53	.
E	293	ALA	C	352	GLN	0.13	5.32	.
E	294	GLN	C	348	SER	18.61	3.16	.
E	294	GLN	C	351	LEU	0.32	5.07	.
E	334	ASN	C	352	GLN	11.08	3.82	.
E	337	TYR	C	352	GLN	14.26	4.34	.
E	357	PRO	C	353	LEU	0.19	5.4	.
E	358	SER	C	353	LEU	19.84	3.83	.
E	360	PRO	C	355	LEU	11.3	3.86	.
E	389	LEU	C	355	LEU	15.67	3.88	.
E	390	LEU	C	352	GLN	0.55	5.64	.
E	390	LEU	C	355	LEU	0.8	5.15	.
E	391	MET	C	352	GLN	12.73	3.42	.
E	391	MET	C	353	LEU	23.69	3.41	.
E	391	MET	C	354	PRO	12.27	3.16	.
E	391	MET	C	355	LEU	24.28	3.25	.
E	392	PRO	C	352	GLN	5.23	3.6	.
E	392	PRO	C	353	LEU	21.03	3.57	.
E	393	VAL	C	348	SER	9.96	3.53	.
E	393	VAL	C	349	ALA	1.64	5.39	.
E	393	VAL	C	351	LEU	8.46	3.72	.
E	393	VAL	C	352	GLN	23.61	2.8	.
E	393	VAL	C	353	LEU	2.55	4.77	.
E	394	ARG	C	351	LEU	42.79	2.94	hb
E	394	ARG	C	353	LEU	43.88	2.96	.
E	395	LEU	C	351	LEU	5.33	4.27	.
E	396	PRO	C	348	SER	10.19	4.34	.
E	396	PRO	C	351	LEU	13.38	4.28	.

## Sheet: DnaE1_2xDnaN_msm_DnaE1_947_954_
Chain1/DnaN	Resnum1	Resname1	Chain2/DnaE1	Resnum2	Resname2	Contact area, Å2	Distance, Å	H-bonds/salt bridges
C	162	LEU	B	953	PHE	3.09	5.08	.
C	179	THR	B	952	LEU	6.09	3.8	.
C	179	THR	B	953	PHE	15.42	4.15	.
C	181	ARG	B	950	PHE	0.2	4.51	.
C	181	ARG	B	951	ASP	33.13	2.54	hb;sb
C	181	ARG	B	952	LEU	15.9	2.77	hb
C	181	ARG	B	953	PHE	28.32	3.77	.
C	181	ARG	B	954	GLY	0.65	5.64	.
C	182	PHE	B	949	GLN	28.38	3.34	.
C	182	PHE	B	950	PHE	8.38	3.38	.
C	182	PHE	B	951	ASP	11.47	4.51	.
C	182	PHE	B	952	LEU	7.77	3.37	.
C	183	ARG	B	952	LEU	8.17	3.42	.
C	184	LEU	B	952	LEU	8.98	4.06	.
C	184	LEU	B	953	PHE	0.47	6.25	.
C	257	PRO	B	953	PHE	25.13	3.54	.
C	258	LYS	B	953	PHE	7.25	4.26	.
C	259	PHE	B	953	PHE	3.54	5.42	.
C	262	LEU	B	952	LEU	29.9	3.68	.
C	262	LEU	B	953	PHE	20.07	3.65	.
C	291	ARG	B	947	MET	12.99	4.5	.
C	292	GLY	B	947	MET	1.02	5.17	.
C	293	ALA	B	947	MET	27.07	3.87	.
C	334	ASN	B	947	MET	3.11	5.86	.
C	334	ASN	B	949	GLN	8.92	3.88	.
C	337	TYR	B	949	GLN	14.13	4.01	.
C	357	PRO	B	950	PHE	1.67	5.11	.
C	358	SER	B	950	PHE	27.42	4.26	.
C	360	PRO	B	952	LEU	9.96	3.82	.
C	389	LEU	B	952	LEU	14.37	4.11	.
C	390	LEU	B	949	GLN	0.19	5.69	.
C	390	LEU	B	952	LEU	0.46	5.27	.
C	391	MET	B	949	GLN	14.29	3.19	hb
C	391	MET	B	950	PHE	22.28	3.23	.
C	391	MET	B	951	ASP	10	3.7	.
C	391	MET	B	952	LEU	25.54	3.09	.
C	392	PRO	B	949	GLN	6.9	3.02	.
C	392	PRO	B	950	PHE	20.42	3.41	hb
C	393	VAL	B	947	MET	12.71	3.65	.
C	393	VAL	B	948	GLY	7.24	3.69	.
C	393	VAL	B	949	GLN	23.15	2.96	.
C	393	VAL	B	950	PHE	4.91	4.23	.
C	394	ARG	B	947	MET	0.83	5.21	.
C	394	ARG	B	948	GLY	25.75	2.72	hb
C	394	ARG	B	950	PHE	36.72	3.77	.
