# Supplementary material for: Investigating the composition and recruitment of the mycobacterial ImuA′–ImuB–DnaE2 mutasome
Source: eLife. 2023 Aug 2;12:e75628. doi: 10.7554/eLife.75628 (PMC10421592; doi:10.7554/eLife.75628)
Supplement: Supplementary file 2. [file elife-75628-supp2.xlsx]

## Sheet: Key reagents
Reagent type (species) or resource	Designation	Source	Identifiers	Additional information
Commercial assay, kit	KOD polymerase	Merck	71086
Commercial assay, kit	T4 Ligase	Thermo Scientific	EL0011
Commercial assay, kit	XhoI-FastDigest	Thermo Scientific	FD0694
Commercial assay, kit	KflI-FastDigest	Thermo Scientific	FD2164
Commercial assay, kit	BstBI restriction enzyme	Thermo Scientific	ER0121	Cloning of ImuAʹ reporter construct
Commercial assay, kit	SexAI restriction enzyme	New England Biolabs	R0605S	Cloning of ImuAʹ reporter construct
Commercial assay, kit	BlpI restriction enzyme	New England Biolabs	R0585S	Cloning of ImuB reporter constructs
Commercial assay, kit	ClaI restriction enzyme	Thermo Scientific	ER0141	Cloning of ImuB reporter constructs
Sequence-based reagent	MSMEG_1622_LIC_F	This Paper	PCR primer	CAGGGACCCGGTATGCCCGAGGGTTCCCG	hnnnk;/'/'
Sequence-based reagent	MSMEG_1622_LIC_R	This Paper	PCR primer	CGAGGAGAAGCCCGGTTATCACTCATAGGCACCCTC
Sequence-based reagent	MSMEG_1620_LIC-F	This Paper	PCR primer	CAGGGACCCGGTATGACAGCTGCGGCTGAC
Sequence-based reagent	MSMEG_1620_LIC-R	This Paper	PCR primer	CGAGGAGAAGCCCGGTTACTAACCGCCCACCGCACGTAC
Sequence-based reagent	eGFP_MSMEG_1622_LIC-R	This Paper	PCR primer	CTTTCAGGGACCCGGGATGGTGAGCAAGGGCGAGGAGC
Sequence-based reagent	eGFP_MSMEG_1622_LIC-F	This Paper	PCR primer	GAGATGAGTTTTTGTTCTTGGTATCACTCATAGGCACCCTCCAGATAC
Sequence-based reagent	Lic1_rv	This Paper	PCR primer	CCCGGGTCCCTGAAAGAGCAC
Sequence-based reagent	Lic1_fw	This Paper	PCR primer	TACCAAGAACAAAAACTCATCTCAGAAGAGG
Sequence-based reagent	VFP_MSMEG_1620_LIC-R	This Paper	PCR primer	GACTCGAGGAGAAGCCCGGGTACTAACCGCCCACCGCACGTAC
Sequence-based reagent	VFP_MSMEG_1620_LIC-F	This Paper	PCR primer	CCTCTTTCAGGGACCCGGGATGGTGTCGAAGGGCGAGGAGC
Sequence-based reagent	MSMEG_0001_LIC-F	This Paper	PCR primer	CAGGGACCCGGTGTGGCGACGACGACGGC
Sequence-based reagent	MSMEG_0001_LIC-R	This Paper	PCR primer	CGAGGAGAAGCCCGGTTATCAGCCCGGAAGCCGCAC
Recombinant DNA reagent	pETNKIhis-3C-LIC-kan	Luna-Vargas, et al., 2011	pETNKIhis-3C-LIC-kan	pET vector backbone (KanR)containing NKI LIC cassette containing N-terminal His6 tag
Recombinant DNA reagent	Lic6-MSMEG_1620	Luna-Vargas, et al., 2011	pCDFNKI-StrepII-3C-LIC-strep	pET vector backbone (StrpR)containing NKI LIC cassette containing N-terminal StrepII tag
Recombinant DNA reagent	pAINT::imuA′	Warner, et al., 2010	pAINT::imuA′
Recombinant DNA reagent	pMCAINT::imuA′-imuB	Warner, et al., 2010	pMCAINT::imuA′-imuB
Recombinant DNA reagent	pTweety::dnaE2	Boshoff, et al., 2003	pTweety::dnaE2
Recombinant DNA reagent	pMCAINT::imuBAAAAGG	Warner, et al., 2010	pMCAINT::imuBAAAAGG
Recombinant DNA reagent	pegfp-dnaE2	This study	pTweety::egfp-dnaE2; GentR
Recombinant DNA reagent	pegfp-imuB	This study	pMCPAINT::egfp-imuB; KanR
Recombinant DNA reagent	pvfp-imuAʹ	This study	pMCPAINT::vfp-imuAʹ; KanR
Recombinant DNA reagent	pegfp-imuBAAAAGG	This study	pMCPAINT::egfp-imuBAAAAGG; KanR
Recombinant DNA reagent	pmEos4a-imuB	This study	pMCPAINT::mEos4a-imuB; KanR
Strain, strain background (Escherichia coli)	Dh5α	Sigma Aldrich
Strain, strain background (Escherichia coli)	BL21(DE3) competent Cells	Sigma Aldrich
Strain, strain background (M. smegmatis)	MC2 155	Snapper, et al., 1990
Strain, strain background (M. smegmatis)	ΔimuA′	Warner, et al., 2010
Strain, strain background (M. smegmatis)	ΔimuB	Warner, et al., 2010
Strain, strain background (M. smegmatis)	ΔdnaE2	Boshoff, et al., 2003
Strain, strain background (M. smegmatis)	ΔimuA′	Warner, et al., 2010
Strain, strain background (M. smegmatis)	dnaN-mCherry	Santi, et al., 2013
Strain, strain background (M. smegmatis)	dnaE2AIA	Warner, et al., 2010
Strain, strain background (M. smegmatis)	ΔdnaE2 attB::egfp-dnaE2	This study	ΔdnaE2 complemented with egfp-dnaE2 at attB site; GentR
Strain, strain background (M. smegmatis)	ΔimuB attB::egfp-imuB	This study	ΔimuB complemented with egfp-imuB at attB site; KanR
Strain, strain background (M. smegmatis)	ΔimuAʹ attB::vfp-imuAʹ	This study	ΔimuAʹ complemented with egfp-imuAʹ at attB site; KanR
Strain, strain background (M. smegmatis)	mCherry-DnaN attB::egfp-dnaE2	This study	mCherry-DnaN carrying egfp-dnaE2 at attB; GentR
Strain, strain background (M. smegmatis)	mCherry-DnaN attB::egfp-imuB	This study	mCherry-DnaN carrying egfp-imuB at attB; KanR
Strain, strain background (M. smegmatis)	mCherry-DnaN attB::vfp-imuAʹ	This study	mCherry-DnaN carrying vfp-imuAʹ at attB; KanR
Strain, strain background (M. smegmatis)	ΔimuAʹ attB::egfp-imuB	This study	ΔimuAʹ carrying egfp-imuB at attB site; KanR
Strain, strain background (M. smegmatis)	dnaE2AIA attB::egfp-imuB	This study	dnaE2AIA carrying egfp-imuB at attB site; KanR
Strain, strain background (M. smegmatis)	ΔdnaE2 attB::egfp-imuB	This study	ΔdnaE2 carrying egfp-imuB at attB site; KanR
Strain, strain background (M. smegmatis)	ΔimuB attB::egfp-imuBAAAAGG	This study	ΔimuB complemented with egfp-imuBAAAAGG at attB; KanR
Strain, strain background (M. smegmatis)	ΔimuB attB::mEos4a-imuB	This study	ΔimuB complemented with mEos4a-imuB at attB site; KanR
Chemical compound, drug	Kanamycin	Sigma-Aldrich	60615
Chemical compound, drug	Streptomycin	Sigma-Aldrich	S6501
Chemical compound, drug	Gentamycin	Sigma-Aldrich	G1264
Chemical compound, drug	IPTG	Fisher Scientific	BP1755-100
Chemical compound, drug	2xYT	Formedium	YDB0103
Chemical compound, drug	Griselimycin	Kling, et al., 2015
Chemical compound, drug	Mitomycin C	Sigma-Aldrich	M0503
Software, algorithm	Fiji	Schindelin et al., 2012
Software, algorithm	MicrobeJ	Ducret et al., 2016
Software, algorithm	R
Software, algorithm	PeakSelector™ v9.5	Shtengel, et al., 2009 (HHMI Janelia, Ashburn, VA)
